# Supplementary material for: Correlates of exclusive breastfeeding practices in rural and urban Niger: a community-based cross-sectional study
Source: Int Breastfeed J. 2019 Jul 30;14:32. doi: 10.1186/s13006-019-0226-9 (PMC6668169; doi:10.1186/s13006-019-0226-9)
Supplement: Supplementary file 1 — Questionnaire on correlates of exclusive breastfeeding practices in Niger. (XLSX 20 kb) [file 13006_2019_226_MOESM1_ESM.xlsx]

## Sheet: Questionaire
Questionnaire
Date:
Survayer:
Village / Ward:
House code :
Full name of child :
Sex of infant: Male / Female
Ⅰ. Socio-demographic
1	Mother and chid health booklet	1	Yes
		2	No
2	Birthday	/ / (dd/mm/yyyy) Source of imformation: MCH booklet / Recall /Others (Specifiy )
3	Age of infant (month)	0	0－1ｍ
		1	1－2ｍ
		2	2－3ｍ
		3	3－4ｍ
		4	4－5ｍ
		5	5－6ｍ
		6	6－7ｍ
4	Ethnic group	1	Hausa
		2	Djerma/songhai
		3	Peul
		4	Kanouri
		5	Touareg
		6	Gourmantché
		7	Toutou
		8	Arabe
		9	Others (Specifiy )
5	Religion	1	Muslim
		2	Christian
		3	Animist
		4	Others (Specifiy )
6	Mother's age	1	-19
		2	20-29
		3	30-39
		4	40-
7	Mother's educational status	1	None
		2	Stopped in primary
		3	Completed in primary
		4	Stopped in secondary
		5	Completed in secondary
		6	Above secondary
		7	Koranic school
8	Husband's educatuinal status	1	None
		2	Stopped in primary
		3	Completed in primary
		4	Stopped in secondary
		5	Completed in secondary
		6	Above secondary
		7	Koranic school
		8	Don,t know
9	Mother's occupation	1	Housewife
		2	Farmer
		3	Self business
		4	Civil servant
		5	Employee
		6	Employer
		7	Seasonal worker
		8	Casual worker
		9	Student
		10	Others (Specifiy )
10	Household head occupation	1	Farmer
		2	Self business
		3	Civil servant
		4	Employee
		5	Employer
		6	Seasonal worker
		7	Casual worker
		8	Student
		9	Others (Specifiy )
11	Gravida		times
12	Parity		times
13	Number of child lost
14	Preceding birth interval	1	No previous birth
		2	<24month
		3	≧24m
Ⅱ. Health-service
1	Number of antenatal care (ANC) visits	times
2	Place of delivery	1	Home
		2	TBA facility
		3	Public hospital
		4	Private hospital
		5	Public maternity
		6	Private maternity
		7	Health center (Centre de Santé Integré)
		8	Dispensary (Case de Santé)
		9	Other (Specific )
3	Type of delivery assistance	1	Health professional
		2	Trained traditional birth attendance
		3	Not trained traditional birth attendance
		4	Other (Specific )
4	Visit postnatal care	1	No
		2	Yes
Ⅲ. Living environment
1	Number of people who are living with more than 6 months
2	Relationship among them	1	My husband
		2	Mother in law
		3	My mother
		4	Father in law
		5	My father
		6	My sister in law
		7	My sister
		8	My brother in law
		9	My brother
		10	Nephew / Niece
		11	My friend
		12	My children
		13	Co-wife and their children
		14	Orphan
		15	Others (Specific )
3	Number of family living together on the same premises
4	Relationship among them	1	Mother in law
		2	My mother
		3	Father in law
		4	My father
		5	My sister in law
		6	My sister
		7	My brother in law
		8	My brother
		9	Nephew / Niece
		10	My friend
		11	My children
		12	Orphan
		13	Tenant
		14	Others (Specific )
5	Person who help infant care	1	My husband
		2	Mother in law
		3	My mother
		4	Father in law
		5	My father
		6	My sister in law
		7	My sister
		8	My brother in law
		9	My brother
		10	My friend
		11	My children
		12	Orphan
		13	None
		14	Others (Specific )
Ⅳ. Socio-economic status
1	Type of house	1	Owned
		2	Rented
		3	Others (Specific )
2	Type of wall	1	Mud/mud bricks
		2	Straw or wood
		3	Mud and cement
		4	Cement bricks
		5	Others (Specific )
3	Type of primary water resource	1	Private piped water
		2	Piped water in the premises
		3	Public piped water
		4	Public well
		5	Private well
		6	River/lake
		7	Others (Specific )
4	Assets ownership	1	Bicycle
		2	Motor Bike
		3	Vehicle
		4	Animal-drawn cart
		5	Electricity
		6	Refrigerator
		7	Radio
		8	Television
		9	Mobile phone
		10	Livestock (Specify: )
Ⅴ. Breastfeeding
1	Type of delivery	1	Normal
		2	Cesarean
		3	Other problem (Specific)
2	Did you give colostrum to (NAME)?	1	Yes
		2	No
3	Why?	1	Nourishes / vitamins
		2	For good health
		3	Custom
		4	Dirty
		5	Others (Specific )
4	When did you feed the infant breast milk first time after birth?	1	Immediately
		2	Within the first one hours
		3	Between one hour and six hours
		4	Between six hours and twelve hours
		5	Within the first day
		6	Within the second day
		7	Within the third day
		8	Not put the breast within the three first days
5	After delivery, did you give religious water(zamzam), water with date, suger water, decoction and honey?	1	Yes
		2	No
6	Has the infant consumed the following fluids or foods since this time of yesterday?	1	Breast milk
		2	Animal milk
		3	Infant formula
		4	Water
		5	Suger water
		6	Juice
		7	Decoction
		8	Honey
		9	Porridge
		10	Fruits
		11	Vitamin, mineral supplement or medicine
7	Has the infant consumed the following fluids or since birth?	1	Breast milk
		2	Vitamin, mineral supplement or medicine
		3	Water
		4	Suger water
			If yes→ only after birth / sometimes
		5	Decoction
			If yes→ only after birth / sometimes
		6	Juice
8	(If the answer is "yes, sometimes" about water, suger water, decoction and juice,) When did you feed water and juice for the first time? When did you feed suger water and decoction for the second time?	1	Before baptism
		2	After baptism
		3	within 1 month
		4	within 2 month
		5	within 3 month
		6	within 4 month
		7	within 5 month
		8	within 6 month
		9	After 6 month
9	Has the infant consumed the following fluids or foods since birth?	1	Animal milk
		2	Infant formula
		3	Honey
			If yes → only after birth / sometimes
		4	Porridge
		5	Fruits
		6	Yoghurt
10	(If the fluids or foods were fed, ) When did you feed your infant fluids or foods except breast milk first time?(month)	1	Before baptism
		2	After baptism
		3	Within 1 month
		4	Within 2 month
		5	Within 3 month
		6	Within 4 month
		7	Within 5 month
		8	within 6 month
		9	After 6 month
11	(In case of non-EBF) Why you feed your infant not only breast milk and religious water but also other fluids or foods within six months after birth?	1	Insufficient breast milk
		2	Breast discomfort
		3	Infant refuse
		4	Prior breastfeeding experience
		5	High temperature
		6	Infant's thirsty
		7	To prevent indigestion
		8	To prevent constipation
		9	Work or school
		10	Insufficience of nutrition
		11	Others (Specific )
